# Supplementary material
Source: HighWire-hosted journal article supplement (https://svn.smart01.highwire.org/content/6/3/458)
Supplement: inline-supplementary-material-1 [file inline-supplementary-material-1.pdf]

## **SUPPLEMENTAL MATERIAL**

### **Low Serum Albumin Levels Predict Poor Outcome in Patients with Acute Ischemic Stroke or Transient Ischemic Attack**

## Catalogs

|                                                                                                                                                               |    |
|---------------------------------------------------------------------------------------------------------------------------------------------------------------|----|
| Supplementary Methods.....                                                                                                                                    | 3  |
| Statistical analysis for the meta-analysis .....                                                                                                              | 3  |
| Supplementary Figures .....                                                                                                                                   | 4  |
| Figure 1. Study flowchart and numbers of eligible patients in each group .....                                                                                | 4  |
| Figure 2. Flowchart on the selection of eligible articles.....                                                                                                | 5  |
| Figure 3. Forest plot of the meta-analysis showed relative risk and 95% CI of mortality in every 1 g/L decreased serum albumin (excluding Idicula, 2009)..... | 6  |
| Figure 4. Funnel plots of studies reporting on the association of serum albumin level with (A) poor functional outcome and (B) mortality .....                | 7  |
| Supplementary Tables.....                                                                                                                                     | 8  |
| Table 1. Baseline characteristics of patients between included and excluded patients.....                                                                     | 8  |
| Table 2. Association of plasma albumin with poor functional outcome (mRS of 3-6) at 3 months and 1 year in analyses stratified for risk factors .....         | 11 |
| Table 3. Association of plasma albumin with mortality at 3 months and 1 year in analyses stratified for risk factors .....                                    | 13 |
| Table 4. Serum albumin levels in different TOAST types .....                                                                                                  | 15 |
| Table 5. The association of serum albumin with outcomes (poor functional outcome and mortality) in 1 year : HR/OR (95%CI) .....                               | 15 |
| Table 6. Summary of the studies exploring an association between serum albumin and poor functional outcome or mortality.....                                  | 16 |
| Table 7. The Newcastle-Ottawa Quality Scale (NOS) for prospective studies .....                                                                               | 19 |
| Table 8. PRISMA Checklist .....                                                                                                                               | 20 |

## Supplementary Methods

### Statistical analysis for the meta-analysis

Details of the included studies were shown in online supplementary table 6 and 7.

Including our study, there was five research with poor functional outcome, and three research with mortality. Two studies had to convert serum albumin unit to g/L.<sup>[1]</sup> Only one paper needed to be converted into the continuous scale (g/L) based on the previous literature.<sup>[2, 3]</sup> The OR/HR per 1g/L serum albumin increase was converted to per 1g/L serum albumin decrease by reverse calculation.<sup>[4-6]</sup> In our study, the risk of poor functional outcome and mortality increased 3% and 4% for every 1 g/L decrease in serum albumin levels (adjusted OR, 1.03; 95%CI, 1.02-1.05; adjusted HR, 1.04, 95%CI, 1.02-1.07) (online supplementary table 5). We combined the odds ratio (OR) and hazard ratio (HR) for prospective studies for a risk ratio (RR<sub>pooled</sub>). The poor functional outcome was analysed by the fixed-effect model, while mortality by the random-effect model according to heterogeneity assessed with the I<sup>2</sup> statistic and the Q statistic.<sup>[7]</sup> Furthermore, we evaluated potential publication bias by the funnel plots, the Begg's tests and the Egger's tests.

## Supplementary Figures

**Figure 1. Study flowchart and numbers of eligible patients in each group**

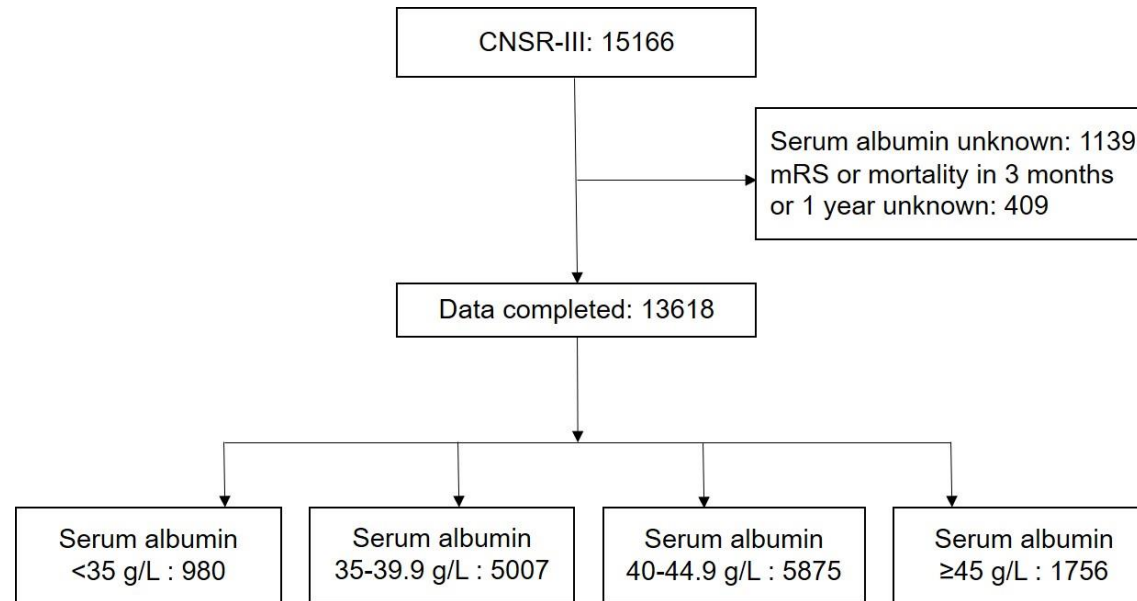

mRS, modified Rankin Scale.

**Figure 2. Flowchart on the selection of eligible articles**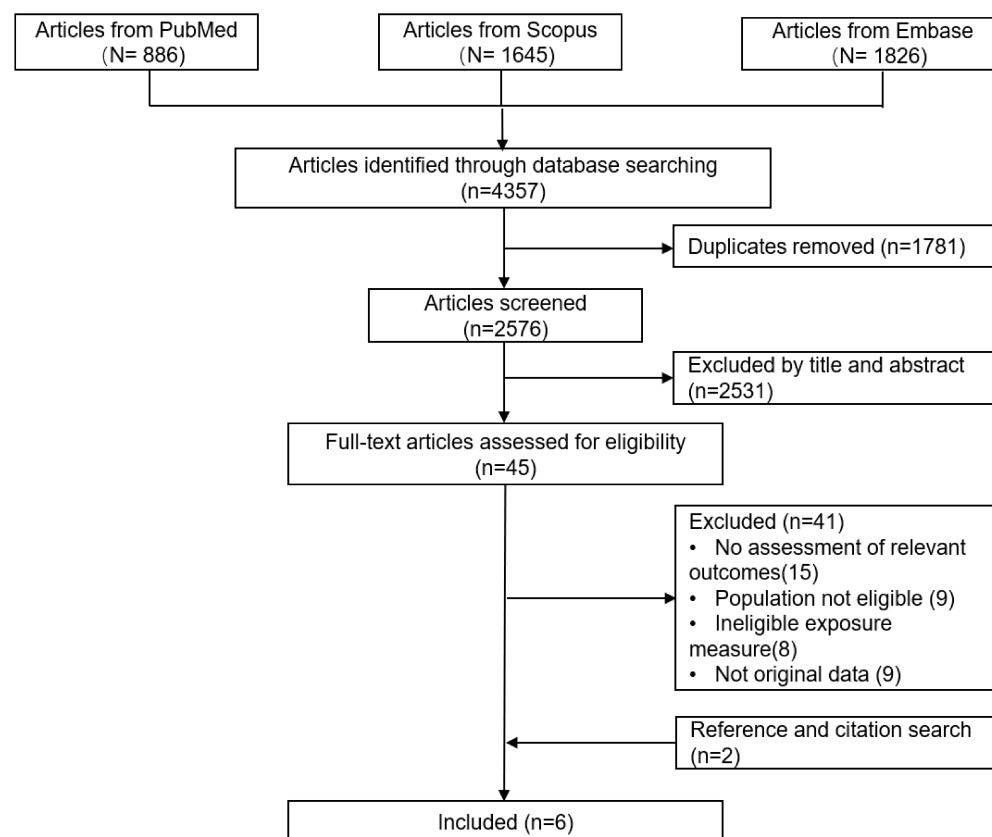

**Figure 3. Forest plot of the meta-analysis showed relative risk and 95% CI of mortality in every 1 g/L decreased serum albumin (excluding Idicula, 2009)**

| Study                                                                                | TE   | SE     | Weight        | Hazard Ratio      |                     |
|--------------------------------------------------------------------------------------|------|--------|---------------|-------------------|---------------------|
|                                                                                      |      |        |               | IV, Fixed, 95% CI |                     |
| Gariballa,1998                                                                       | 0.03 | 0.0418 | 6.2%          | 1.03              | [0.95, 1.12]        |
| Cater,2007                                                                           | 0.09 | 0.0440 | 5.6%          | 1.09              | [1.00, 1.19]        |
| Alcázar,2013                                                                         | 0.07 | 0.0264 | 15.6%         | 1.07              | [1.02, 1.13]        |
| Zhou,2020                                                                            | 0.04 | 0.0122 | 72.6%         | 1.04              | [1.02, 1.07]        |
| <b>Total (95% CI)</b>                                                                |      |        | <b>100.0%</b> | <b>1.05</b>       | <b>[1.03, 1.07]</b> |
| Heterogeneity: $\tau^2 = 0$ ; $\chi^2 = 1.97$ , $df = 3$ ( $P = 0.58$ ); $I^2 = 0\%$ |      |        |               |                   |                     |
| Test for overall effect: $Z = 4.39$ ( $P < 0.01$ )                                   |      |        |               |                   |                     |

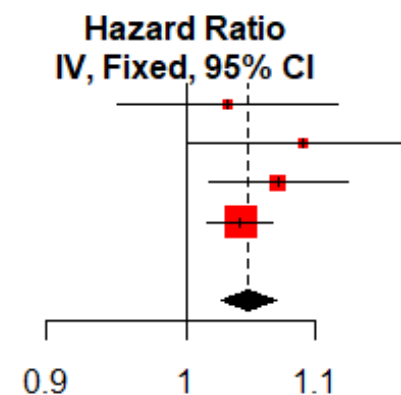

**Figure 4. Funnel plots of studies reporting on the association of serum albumin level with (A) poor functional outcome and (B) mortality**

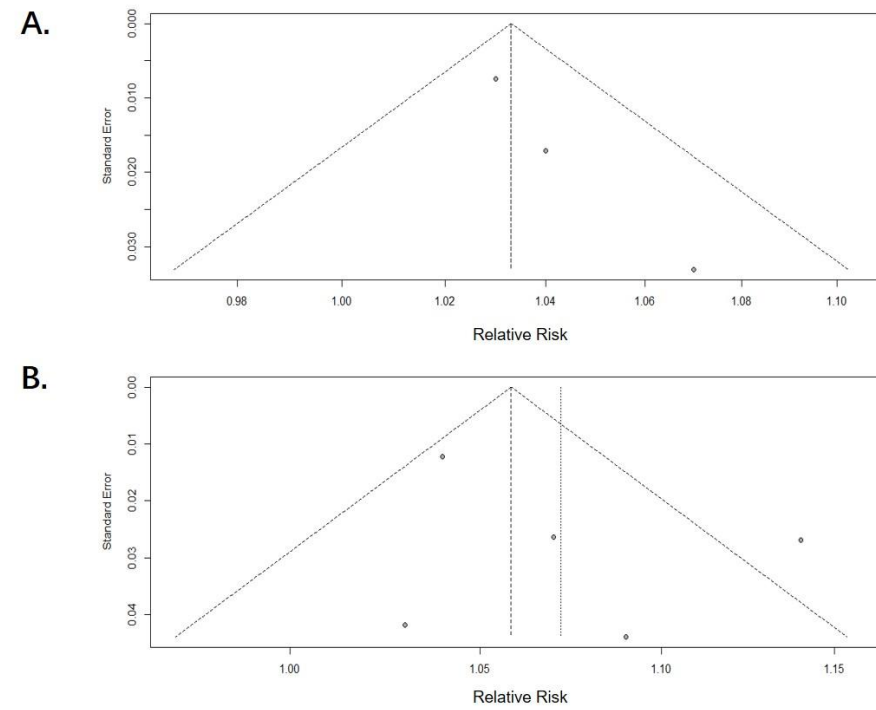

## Supplementary Tables

Table 1. Baseline characteristics of patients between included and excluded patients

| Variable                           | Included    | Excluded   | P Value |
|------------------------------------|-------------|------------|---------|
|                                    | n=13618     | n=1548     |         |
| Age, y, mean (SD)                  | 62.2±11.3   | 62.7±11.6  | 0.07    |
| Men, n (%)                         | 9276(68.1)  | 1088(70.3) | 0.08    |
| BMI, kg/m <sup>2</sup> , mean (SD) | 24.7±3.3    | 24.9±3.5   | 0.16    |
| Medical history, n (%)             |             |            |         |
| Hypertension                       | 8503(62.4)  | 991(64.0)  | 0.22    |
| Diabetes mellitus                  | 3135(23.0)  | 375(24.2)  | 0.29    |
| Dyslipidemia                       | 1070(7.9)   | 121(7.8)   | 0.96    |
| Stroke or TIA                      | 3005(22.1)  | 350(22.6)  | 0.63    |
| Coronary heart disease             | 1432(10.5)  | 176(11.4)  | 0.30    |
| Atrial fibrillation/ flutter       | 911(6.7)    | 108(7.0)   | 0.67    |
| Peripheral vascular disease        | 90(0.7)     | 28(1.8)    | <0.0001 |
| Index event, n (%)                 |             |            |         |
| Ischemic stroke                    | 12690(93.2) | 1456(94.1) | 0.19    |
| TIA                                | 928(6.8)    | 92(5.9)    |         |
| TOAST types, n (%)                 |             |            |         |
| Large-artery atherosclerosis       | 3441(25.3)  | 415(26.8)  | 0.12    |



| Variable                               | Included         | Excluded       | P Value |
|----------------------------------------|------------------|----------------|---------|
|                                        | n=13618          | n=1548         |         |
| Cardioembolism                         | 824(6.1)         | 93(6.0)        |         |
| Small-vessel occlusion                 | 2836(20.8)       | 329(21.3)      |         |
| Other determined etiology              | 173(1.3)         | 9(0.6)         |         |
| Undetermined etiology                  | 6344(46.6)       | 702(45.4)      |         |
| Smoking status, n (%)                  |                  |                |         |
| Never                                  | 7674(56.4)       | 832(53.8)      | 0.005   |
| Previous                               | 1674(12.3)       | 234(15.1)      |         |
| Current                                | 4270(31.4)       | 482(31.1)      |         |
| NIHSS score on admission, median (IQR) | 3(1-6)           | 4(2-6)         | <0.0001 |
| Pre-stroke mRS 0~2, n (%)              | 13044(95.8)      | 1465(94.6)     | 0.04    |
| Arterial stenosis, n (%)               |                  |                |         |
| ICAS                                   | 3382/11689(28.9) | 431/1323(32.6) | 0.006   |
| ECAS                                   | 529/11689(4.5)   | 67/1323(5.1)   | 0.37    |
| Acute recanalization therapy, n (%)    |                  |                |         |
| Intravenous thrombolysis               | 1146(8.4)        | 157(10.1)      | 0.02    |
| Endovascular therapy                   | 85(0.6)          | 10(0.7)        | 0.92    |
| Inpatient medication, n (%)            |                  |                |         |
| Antihypertensive agents                | 6237(45.8)       | 763(49.3)      | 0.009   |
| Hypoglycemic agents                    | 3374(24.8)       | 418(27.0)      | 0.06    |
| Cholesterol-lowering agents            | 13033(95.7)      | 1473(95.2)     | 0.32    |
| Antiplatelet agents                    | 13142(96.5)      | 1471(95.0)     | 0.003   |
| Anticoagulant agents                   | 1372(10.1)       | 174(11.2)      | 0.15    |
| Laboratory tests                       |                  |                |         |

| Variable                                     | Included        | Excluded        | P Value |
|----------------------------------------------|-----------------|-----------------|---------|
|                                              | n=13618         | n=1548          |         |
| TC, mmol/L, mean (SD)                        | 4.13±1.23       | 4.07±1.12       | 0.27    |
| LDL, mmol/L, mean (SD)                       | 2.45±1.08       | 2.40±1.00       | 0.40    |
| HDL, mmol/L, mean (SD)                       | 0.97±0.30       | 0.95±0.29       | 0.19    |
| TG, mmol/L, mean (SD)                        | 1.60±0.92       | 1.58±0.90       | 0.36    |
| eGFR, mL/min/1.73 m <sup>2</sup> , mean (SD) | 92.0±33.7       | 92.0±37.7       | 0.37    |
| ALT, U/L, median (IQR)                       | 18.0(13.0-25.7) | 18.0(13.6-27.0) | 0.11    |
| hs-CRP, mg/L, median (IQR)                   | 1.7(0.8-4.6)    | 2.1(0.9-5.6)    | <0.0001 |

BMI, body mass index; TIA, transient ischemic attack; TOAST, the Trial of Org 10172 in Acute Stroke Treatment; NIHSS, National Institute of Health Stroke Scale; mRS, modified Rankin Scale; ICAS, intracranial arterial stenosis; ECAS, extracranial arterial stenosis; TC, total cholesterol; HDL, high-density lipoprotein; LDL, low-density lipoprotein; TG, triglyceride; eGFR, estimated glomerular filtration rate; ALT, alanine aminotransferase; hs-CRP, high-sensitivity C-reactive protein; IQR, interquartile range; SD, standard deviation.

**Table 2. Association of plasma albumin with poor functional outcome (mRS of 3-6) at 3 months and 1 year in analyses stratified for risk factors**

| Variable                     | mRS 3-6 at 3 months (%) | Adjusted OR of per 10 g/L decrease | Adjusted <i>P</i> for interaction* | mRS 3-6 at 1 year (%) | Adjusted OR of per 10 g/L decrease | Adjusted <i>P</i> for interaction* |
|------------------------------|-------------------------|------------------------------------|------------------------------------|-----------------------|------------------------------------|------------------------------------|
| Age, Years                   |                         |                                    | 0.56                               |                       |                                    | 0.16                               |
| <70y                         | 1088/10020 (10.9)       | 1.15(0.96-1.38)                    |                                    | 942/10020 (9.4)       | 1.35(1.12-1.62)                    |                                    |
| ≥70y                         | 783/3598(21.7)          | 1.14(0.90-1.45)                    |                                    | 843/3598(23.4)        | 1.48(1.17-1.87)                    |                                    |
| Sex                          |                         |                                    | 0.76                               |                       |                                    | 0.84                               |
| Men                          | 1145/9276(12.3)         | 1.19(0.99-1.42)                    |                                    | 1108/9276(11.9)       | 1.46(1.21-1.75)                    |                                    |
| Women                        | 726/4342(16.7)          | 1.15(0.91-1.46)                    |                                    | 677/4342(15.6)        | 1.39(1.09-1.77)                    |                                    |
| BMI                          |                         |                                    | 0.88                               |                       |                                    | 0.36                               |
| <18.5 kg/m <sup>2</sup>      | 76/295(25.8)            | 0.99(0.42-2.36)                    |                                    | 77/295(26.1)          | 2.39(0.89-6.43)                    |                                    |
| ≥18.5 kg/m <sup>2</sup>      | 1795/13323 (13.5)       | 1.16(1.00-1.34)                    |                                    | 1708/13323(12.8)      | 1.39(1.20-1.61)                    |                                    |
| TOAST Types                  |                         |                                    | 0.89                               |                       |                                    | 0.94                               |
| Large-artery atherosclerosis | 686/3441(19.9)          | 1.07(0.84-1.38)                    |                                    | 631/3441(18.3)        | 1.35(1.05-1.75)                    |                                    |
| Cardioembolism               | 156/824(18.9)           | 1.22(0.71-2.09)                    |                                    | 161/824(19.5)         | 1.37(0.79-2.36)                    |                                    |
| Small-vessel occlusion       | 200/2836(7.1)           | 1.34(0.88-2.04)                    |                                    | 184/2836(6.5)         | 1.49(0.97-2.29)                    |                                    |
| Other determined etiology    | 29/173(16.8)            | 0.92(0.24-3.59)                    |                                    | 30/173(17.3)          | 0.89(0.22-3.70)                    |                                    |
| Undetermined etiology        | 800/6344(12.6)          | 1.18(0.96-1.46)                    |                                    | 799/6344(12.3)        | 1.47(1.19-1.82)                    |                                    |
| NIHSS score on admission     |                         |                                    | 0.42                               |                       |                                    | 0.13                               |
| ≤3                           | 372/7495(5.0)           | 1.22(0.92-1.62)                    |                                    | 442/7495(5.9)         | 1.65(1.28-2.14)                    |                                    |

| Variable                       | mRS 3-6 at 3 months (%) | Adjusted OR of per 10 g/L decrease | Adjusted <i>P</i> for interaction* | mRS 3-6 at 1 year (%) | Adjusted OR of per 10 g/L decrease | Adjusted <i>P</i> for interaction* |
|--------------------------------|-------------------------|------------------------------------|------------------------------------|-----------------------|------------------------------------|------------------------------------|
| >3                             | 1499/6123(24.5)         | 1.14(0.97-1.33)                    |                                    | 1343/6123(21.9)       | 1.29(1.09-1.52)                    |                                    |
| NIHSS score on admission       |                         |                                    | 0.04                               |                       |                                    | 0.09                               |
| ≤10                            | 1320/12630(10.5)        | 1.22(1.05-1.42)                    |                                    | 1284/12630(10.2)      | 1.46(1.25-1.70)                    |                                    |
| >10                            | 551/988(55.8)           | 0.92(0.65-1.31)                    |                                    | 501/988(50.7)         | 1.13(0.79-1.62)                    |                                    |
| eGFR                           |                         |                                    | 0.80                               |                       |                                    | 0.25                               |
| <60 mL/min/1.73 m <sup>2</sup> | 156/718(21.7)           | 1.11(0.70-1.78)                    |                                    | 168/718(23.4)         | 1.83(1.18-2.84)                    |                                    |
| ≥60 mL/min/1.73 m <sup>2</sup> | 1153/8896(13.0)         | 1.19(0.99-1.44)                    |                                    | 1072/8896(12.1)       | 1.46(1.20-1.76)                    |                                    |
| eGFR                           |                         |                                    | 0.56                               |                       |                                    | 0.13                               |
| <90 mL/min/1.73 m <sup>2</sup> | 669/3978(16.8)          | 1.13(0.89-1.43)                    |                                    | 690/3978(17.4)        | 1.68(1.33-2.12)                    |                                    |
| ≥90 mL/min/1.73 m <sup>2</sup> | 640/5636(11.4)          | 1.31(1.02-1.69)                    |                                    | 550/5636(9.8)         | 1.40(1.08-1.82)                    |                                    |

\*Adjustment model: age, sex, BMI, medical history (hypertension, DM, stroke or TIA, coronary heart disease and atrial fibrillation/flutter), index event, TOAST types, pre-stroke mRS 0-2, NIHSS scores on admission, intracranial arterial stenosis, extracranial arterial stenosis, intravenous thrombolysis, inpatient medication (antihypertensive agents, anticoagulant agents), serum TG, TC, LDL, HDL, ALT, eGFR, and hs-CRP.

BMI, body mass index; TOAST, the Trial of Org 10172 in Acute Stroke Treatment; NIHSS, National Institute of Health Stroke Scale; mRS, modified Rankin Scale; TC, total cholesterol; HDL, high-density lipoprotein; LDL, low-density lipoprotein; TG, triglyceride; eGFR, estimated glomerular filtration rate; ALT, alanine aminotransferase; hs-CRP, high-sensitivity C-reactive protein; OR, odds ratio.

**Table 3. Association of plasma albumin with mortality at 3 months and 1 year in analyses stratified for risk factors**

| Variable                     | Mortality at 3 months (%) | Adjusted HR of per 10 g/L decrease | Adjusted <i>P</i> for interaction* | Mortality at 1 year (%) | Adjusted HR of per 10 g/L decrease | Adjusted <i>P</i> for interaction* |
|------------------------------|---------------------------|------------------------------------|------------------------------------|-------------------------|------------------------------------|------------------------------------|
| Age, Years                   |                           |                                    | 0.35                               |                         |                                    | 0.35                               |
| <70y                         | 82/10020(0.8)             | 1.61(0.93-2.78)                    |                                    | 185/10020(1.9)          | 1.75(1.23-2.49)                    |                                    |
| ≥70y                         | 113/3598(3.14)            | 1.87(1.16-3.04)                    |                                    | 245/3598(6.8)           | 1.33(0.96-1.84)                    |                                    |
| Sex                          |                           |                                    | 0.72                               |                         |                                    | 0.65                               |
| Men                          | 115/9276(1.2)             | 1.75(1.11-2.77)                    |                                    | 270/9276(2.9)           | 1.50(1.11-2.02)                    |                                    |
| Women                        | 80/4342(1.8)              | 2.00(1.12-3.56)                    |                                    | 160/4342(3.7)           | 1.56(1.03-2.35)                    |                                    |
| BMI                          |                           |                                    | 0.48                               |                         |                                    | 0.19                               |
| <18.5 kg/m <sup>2</sup>      | 16/295(5.4)               | 2.43(0.30-19.55)                   |                                    | 27/295(9.2)             | 5.23(1.18-23.22)                   |                                    |
| ≥18.5 kg/m <sup>2</sup>      | 179/13323(1.3)            | 1.09(0.99-1.21)                    |                                    | 403/13323(3.0)          | 1.49(1.16-1.91)                    |                                    |
| TOAST Types                  |                           |                                    | 0.80                               |                         |                                    | 0.21                               |
| Large-artery atherosclerosis | 62/3441(1.8)              | 1.91(1.01-3.61)                    |                                    | 135/3441(3.9)           | 1.43(0.91-2.24)                    |                                    |
| Cardioembolism               | 25/824(3.0)               | 2.38(0.77-7.41)                    |                                    | 57/824(6.9)             | 1.53(0.72-3.26)                    |                                    |
| Small-vessel occlusion       | 9/2836(0.3)               | 0.96(0.18-5.19)                    |                                    | 32/2836(1.1)            | 1.02(0.42-2.49)                    |                                    |
| Other determined etiology    | 3/173(1.7)                | -                                  |                                    | 11/173(6.4)             | 0.54(0.09-3.36)                    |                                    |
| Undetermined etiology        | 96/6344(1.5)              | 1.78(1.07-2.96)                    |                                    | 195/6344(3.1)           | 1.70(1.20-2.41)                    |                                    |
| NIHSS score on admission     |                           |                                    | 0.40                               |                         |                                    | 0.11                               |
| ≤3                           | 57/7495(0.8)              | 1.64(0.85-3.16)                    |                                    | 131/7495(1.8)           | 1.26(0.82-1.93)                    |                                    |
| >3                           | 138/6123(2.3)             | 1.89(1.24-2.88)                    |                                    | 299/6123(4.9)           | 1.64(1.23-2.19)                    |                                    |

| Variable                       | Mortality at 3 months (%) | Adjusted HR of per 10 g/L decrease | Adjusted <i>P</i> for interaction* | Mortality at 1 year (%) | Adjusted HR of per 10 g/L decrease | Adjusted <i>P</i> for interaction* |
|--------------------------------|---------------------------|------------------------------------|------------------------------------|-------------------------|------------------------------------|------------------------------------|
| NIHSS score on admission       |                           |                                    | 0.02                               |                         |                                    | 0.18                               |
| ≤10                            | 116/12630(0.92)           | 2.45(1.56-3.85)                    |                                    | 296/12630(2.34)         | 1.60(1.20-2.13)                    |                                    |
| >10                            | 79/988(8.00)              | 1.03(0.59-1.78)                    |                                    | 134/988(13.56)          | 1.15(0.75-1.75)                    |                                    |
| eGFR                           |                           |                                    | 0.34                               |                         |                                    | 0.87                               |
| <60 mL/min/1.73 m <sup>2</sup> | 24/718(3.34)              | 0.98(0.30-3.20)                    |                                    | 60/718(8.36)            | 1.33(0.72-2.45)                    |                                    |
| ≥60 mL/min/1.73 m <sup>2</sup> | 119/8896(1.34)            | 1.94(1.21-3.10)                    |                                    | 248/8896(2.79)          | 1.46(1.05-2.02)                    |                                    |
| eGFR                           |                           |                                    | 0.37                               |                         |                                    | 0.93                               |
| <90 mL/min/1.73 m <sup>2</sup> | 92/3978(2.31)             | 1.82(1.10-3.02)                    |                                    | 206/3978(5.18)          | 1.53(1.09-2.15)                    |                                    |
| ≥90 mL/min/1.73 m <sup>2</sup> | 51/5636(0.90)             | 1.62(0.76-3.44)                    |                                    | 102/5636(1.81)          | 1.66(0.98-2.83)                    |                                    |

\*Adjustment model: age, sex, BMI, medical history (hypertension, DM, stroke or TIA, coronary heart disease and atrial fibrillation/fullter), index event, TOAST types, pre-stroke mRS 0-2, NIHSS scores on admission, intracranial arterial stenosis, extracranial arterial stenosis, intravenous thrombolysis, inpatient medication (antihypertensive agents, anticoagulant agents), serum TG, TC, LDL, HDL, ALT, eGFR, and hs-CRP.

BMI, body mass index; TOAST, the Trial of Org 10172 in Acute Stroke Treatment; NIHSS, National Institute of Health Stroke Scale; mRS, modified Rankin Scale; TC, total cholesterol; HDL, high-density lipoprotein; LDL, low-density lipoprotein; TG, triglyceride; eGFR, estimated glomerular filtration rate; ALT, alanine aminotransferase; hs-CRP, high-sensitivity C-reactive protein; HR, hazard ratio.

**Table 4. Serum albumin levels in different TOAST types**

| Variable                      | Large-artery atherosclerosis<br>n= 3441 | Cardioembolism<br>n= 824 | Small-vessel occlusion<br>n= 2836 | Other determined etiology<br>n=173 | Undetermined etiology<br>n=6344 | <i>P</i> for trend |
|-------------------------------|-----------------------------------------|--------------------------|-----------------------------------|------------------------------------|---------------------------------|--------------------|
| Serum albumin, g/L, mean (SD) | 40.3±2.0                                | 39.3±3.8                 | 41.0±3.9                          | 40.2±4.9                           | 40.6±4.1                        | <0.0001            |

TOAST, the Trial of Org 10172 in Acute Stroke Treatment.

**Table 5. The association of serum albumin with outcomes (poor functional outcome and mortality) in 1 year : HR/OR (95%CI)**

| Outcomes            | N of events, % | Every 1 g/L decrease after adjustment* |
|---------------------|----------------|----------------------------------------|
| mRS 3-6 at 1 year   | 1785(13.1)     | 1.03(1.02-1.05)                        |
| Mortality in 1 year | 430(3.2)       | 1.04(1.02-1.07)                        |

\*Adjustment model: age, sex, BMI, medical history (hypertension, DM, stroke or TIA, coronary heart disease and atrial fibrillation/fullter), index event, TOAST types, pre-stroke mRS 0-2, NIHSS scores on admission, intracranial arterial stenosis, extracranial arterial stenosis, intravenous thrombolysis, inpatient medication (antihypertensive agents, anticoagulant agents), serum TG, TC, LDL, HDL, ALT, eGFR, and hs-CRP.

mRS, modified Rankin Scale; HR, hazard ratio; OR, odds ratio.

**Table 6. Summary of the studies exploring an association between serum albumin and poor functional outcome or mortality**

| Author, year                                      | Country | N0. of subjects | Participants          | Age, years | Men, %     | Follow-up time     | NOS score | Albumin comparison | Study outcome(no.)     | Adjustments                                                                                                                      | Effect estimate (95% CI) | Unified effect estimate (95% CI) |
|---------------------------------------------------|---------|-----------------|-----------------------|------------|------------|--------------------|-----------|--------------------|------------------------|----------------------------------------------------------------------------------------------------------------------------------|--------------------------|----------------------------------|
| Gariballa SE <i>et al</i> <sup>5</sup> 1998       | UK      | 225             | Acute ischemic stroke | 77.6±9.4   | 96(42.7)   | 3 months           | 9         | Per +1 g/L         | Mortality              | Age, sex, mRS, previous illnesses, drugs, smoking                                                                                | HR:0.91(0.84-0.99)       | HR:1.03(1.01-1.19)               |
| Dziedzic T <i>et al</i> <sup>6</sup> , 2004       | Poland  | 759             | Acute ischemic stroke | 68.3±12    | 372(49.0)  | 3 months           | 9         | Per +1g/L          | Poor outcome (mRS 4-6) | Age, sex, atrial fibrillation, ischemic heart disease, smoking, SSS score on admission, infarct size, TC                         | OR:0.96(0.93-0.99)       | OR:1.04(1.01-1.08)               |
| Carter AM <i>et al</i> <sup>2</sup> ,2007         | UK      | 545             | Acute ischemic stroke | -          | 274(50.3)  | 7.4 years (median) | 9         | >43 g/L vs <38 g/L | Mortality              | Age, stroke subtype, previous stroke/TIA, atrial fibrillation, creatinine, haemoglobin, fibrinogen, FVIII, FXIII, β-TG, vWF, tPA | HR:0.65(0.44-0.96)       | HR:1.09(1.01-1.20)               |
| Idicula TT <i>et al</i> <sup>4</sup> , 2009       | Norway  | 444             | Acute ischemic stroke | 70.3±14.4  | 250(56.3)  | 2 years            | 8         | Per +1g/L          | Mortality              | Age, sex and NIHSS score on admission                                                                                            | OR:0.88(0.83-0.93)       | OR:1.14(1.08-1.20)               |
| Alcázar Lázaro V <i>et al</i> <sup>1</sup> , 2013 | Spain   | 260             | Acute ischemic stroke | -          | 127 (48.8) | 5 years            | 9         | Per -1 g/dL        | Mortality              | Age, BMI, cardiopathy, atrial fibrillation, urea, calcemia, total proteins, cholesterol, glycemia, embolic                       | OR:2.00(1.12-3)          | OR:1.07(1.01-1.12)               |



| Author, year                               | Country | N0. of subjects | Participa nts                                      | Age, years  | Men, %      | Follow-up time | NOS score | Albumin comparison | Study outcome(no.)     | Adjustments                                                                                                                                                                                                                                                                                | Effect estimate (95% CI) | Unified effect estimate (95% CI) |
|--------------------------------------------|---------|-----------------|----------------------------------------------------|-------------|-------------|----------------|-----------|--------------------|------------------------|--------------------------------------------------------------------------------------------------------------------------------------------------------------------------------------------------------------------------------------------------------------------------------------------|--------------------------|----------------------------------|
|                                            |         |                 |                                                    |             |             |                |           |                    |                        | mechanism, coma, DBP, Canadian scale score on admission                                                                                                                                                                                                                                    |                          |                                  |
| Babu MS <i>et al</i> <sup>[8]</sup> , 2013 | India   | 560             | Acute ischemic stroke                              | -           | 401(71.6)   | 3 months       | 9         | Per -1 g/dL        | Poor outcome (mRS 4-6) | Age, sex, smoking, diabetes, hypertension, alcoholism, TC, HDL-C, LDL-C and TG                                                                                                                                                                                                             | OR:1.972(1.103- 4.001)   | OR:1.07(1.01- 1.15)              |
| Zhou HY <i>et al</i> , 2020                | China   | 13618           | Acute ischemic stroke or transient ischemic attack | 62.17±11.26 | 9276(68.12) | 1 year         | 9         | Per -1g/L          | Poor outcome (mRS 3-6) | Age, sex, BMI, medical history (hypertension, diabetes mellitus, stroke or TIA, coronary heart disease and atrial fibrillation/flutter),                                                                                                                                                   | OR:1.03(1.02- 1.05)      | OR:1.03(1.02- 1.05)              |
|                                            |         |                 |                                                    |             |             |                |           |                    | Mortality              | diagnosis type, TOAST type, NIHSS score on admission, Pre-stroke mRS 0~2 on admission, intracranial arterial stenosis, extracranial arterial stenosis, intravenous thrombolysis, inpatient medication (antihypertensive agents, anticoagulant agents), TG, TC, LDL, HDL, ALT, eGFR, hs-CRP | HR:1.04(1.02- 1.07)      | HR:1.04(1.02- 1.07)              |

BMI, body mass index; TOAST, the Trial of Org 10172 in Acute Stroke Treatment; NIHSS, National Institute of Health Stroke Scale; mRS, modified Rankin Scale; TC, total cholesterol; HDL, high-density lipoprotein; LDL, low-density lipoprotein; TG, triglyceride; eGFR, estimated glomerular filtration rate; ALT, alanine aminotransferase; hs-CRP, high-sensitivity C-reactive protein; DBP, diastolic blood pressure; vWF, von Willebrand factor; tPA, tissue-type plasminogen activator; OR, odds ratio; HR, hazard ratio; NOS, the Newcastle-Ottawa Scale.

**Table 7. The Newcastle-Ottawa Quality Scale (NOS) for prospective studies**

|                                            | Selection                                |                                     |                           |                                 | Comparability | Outcome                                   |                       |                     | Total |
|--------------------------------------------|------------------------------------------|-------------------------------------|---------------------------|---------------------------------|---------------|-------------------------------------------|-----------------------|---------------------|-------|
|                                            | Representativeness of the exposed cohort | Selection of the non-exposed cohort | Ascertainment of exposure | Outcome not present at baseline |               | Adjustments i) age ii) additional factors | Assessment of outcome | Length of follow-up |       |
| Gariballa SE <i>et al</i> <sup>5</sup>     | *                                        | *                                   | *                         | *                               | **            | *                                         | *                     | *                   | 9     |
| Dziedzic T <i>et al</i> <sup>6</sup>       | *                                        | *                                   | *                         | *                               | **            | *                                         | *                     | *                   | 9     |
| Carter AM <i>et al</i> <sup>2</sup>        | *                                        | *                                   | *                         | *                               | **            | *                                         | *                     | *                   | 9     |
| Idícula TT <i>et al</i> <sup>4</sup>       | *                                        | *                                   | *                         | *                               | **            | *                                         |                       | *                   | 8     |
| Alcázar Lázaro V <i>et al</i> <sup>1</sup> | *                                        | *                                   | *                         | *                               | **            | *                                         | *                     | *                   | 9     |
| Babu MS <i>et al</i> <sup>8</sup>          | *                                        | *                                   | *                         | *                               | **            | *                                         | *                     | *                   | 9     |

**Table 8. PRISMA Checklist**

| PRISMA Checklist          | # | Checklist item                                                                                                                                                                                                                                                                                              | Reported on page #                                                                                                                  |
|---------------------------|---|-------------------------------------------------------------------------------------------------------------------------------------------------------------------------------------------------------------------------------------------------------------------------------------------------------------|-------------------------------------------------------------------------------------------------------------------------------------|
| <b>TITLE</b>              |   |                                                                                                                                                                                                                                                                                                             |                                                                                                                                     |
| title                     | 1 | Identify the report as a systematic review, meta-analysis, or both.                                                                                                                                                                                                                                         | Because the meta-analysis was added after the original analysis, and the title had a word limit, it was not reflected in the title. |
| <b>ABSTRACT</b>           |   |                                                                                                                                                                                                                                                                                                             |                                                                                                                                     |
| Structured summary        | 2 | Provide a structured summary including, as applicable: background; objectives; data sources; study eligibility criteria, participants, and interventions; study appraisal and synthesis methods; results; limitations; conclusions and implications of key findings; systematic review registration number. | Page 6 Paragraph 3                                                                                                                  |
| <b>INTRODUCTION</b>       |   |                                                                                                                                                                                                                                                                                                             |                                                                                                                                     |
| Rationale                 | 3 | Describe the rationale for the review in the context of what is already known.                                                                                                                                                                                                                              | Page 3 Paragraph 2                                                                                                                  |
| Objectives                | 4 | Provide an explicit statement of questions being addressed with reference to participants, interventions, comparisons, outcomes, and study design (PICOS).                                                                                                                                                  | Page 6 Paragraph 3                                                                                                                  |
| <b>METHODS</b>            |   |                                                                                                                                                                                                                                                                                                             |                                                                                                                                     |
| Protocol and registration | 5 | Indicate if a review protocol exists, if and where it can be accessed (e.g., Web address), and, if available, provide registration information including registration number.                                                                                                                               | None                                                                                                                                |

|                                    |    |                                                                                                                                                                                                                        |                                         |
|------------------------------------|----|------------------------------------------------------------------------------------------------------------------------------------------------------------------------------------------------------------------------|-----------------------------------------|
| Eligibility criteria               | 6  | Specify study characteristics (e.g., PICOS, length of follow-up) and report characteristics (e.g., years considered, language, publication status) used as criteria for eligibility, giving rationale.                 | Page 6 Paragraph 3                      |
| Information sources                | 7  | Describe all information sources (e.g., databases with dates of coverage, contact with study authors to identify additional studies) in the search and date last searched.                                             | Page 6 Paragraph 3                      |
| Search                             | 8  | Present full electronic search strategy for at least one database, including any limits used, such that it could be repeated.                                                                                          | Page 6 Paragraph 3                      |
| Study selection                    | 9  | State the process for selecting studies (i.e., screening, eligibility, included in systematic review, and, if applicable, included in the meta-analysis).                                                              | Page 6 Paragraph 3                      |
| Data collection process            | 10 | Describe method of data extraction from reports (e.g., piloted forms, independently, in duplicate) and any processes for obtaining and confirming data from investigators.                                             | Page 6 Paragraph 3                      |
| Data items                         | 11 | List and define all variables for which data were sought (e.g., PICOS, funding sources) and any assumptions and simplifications made.                                                                                  | Page 6 Paragraph 3                      |
| Risk of bias in individual studies | 12 | Describe methods used for assessing risk of bias of individual studies (including specification of whether this was done at the study or outcome level), and how this information is to be used in any data synthesis. | Online supplementary Page 3 Paragraph 1 |
| Summary measures                   | 13 | State the principal summary measures (e.g., risk ratio, difference in means).                                                                                                                                          | Page 6 Paragraph 3                      |
| Synthesis of results               | 14 | Describe the methods of handling data and combining results of                                                                                                                                                         | Online supplementary Page 3             |

|                               |    |                                                                                                                                                                                                          |                                         |
|-------------------------------|----|----------------------------------------------------------------------------------------------------------------------------------------------------------------------------------------------------------|-----------------------------------------|
|                               |    | studies, if done, including measures of consistency (e.g., I <sup>2</sup> ) for each meta-analysis.                                                                                                      | Paragraph 1                             |
| Risk of bias across studies   | 15 | Specify any assessment of risk of bias that may affect the cumulative evidence (e.g., publication bias, selective reporting within studies).                                                             | Online supplementary Page 3 Paragraph 1 |
| Additional analyses           | 16 | Describe methods of additional analyses (e.g., sensitivity or subgroup analyses, meta-regression), if done, indicating which were pre-specified.                                                         | Online supplementary Page 3 Paragraph 1 |
| <b>RESULTS</b>                |    |                                                                                                                                                                                                          |                                         |
| Study selection               | 17 | Give numbers of studies screened, assessed for eligibility, and included in the review, with reasons for exclusions at each stage, ideally with a flow diagram.                                          | Online supplementary figure 2           |
| Study characteristics         | 18 | For each study, present characteristics for which data were extracted (e.g., study size, PICOS, follow-up period) and provide the citations                                                              | Online supplementary table 6            |
| Risk of bias within studies   | 19 | Present data on risk of bias of each study and, if available, any outcome level assessment (see item 12).                                                                                                | Online supplementary table 7            |
| Results of individual studies | 20 | For all outcomes considered (benefits or harms), present, for each study: (a) simple summary data for each intervention group (b) effect estimates and confidence intervals, ideally with a forest plot. | Online supplementary table 8 figure 4   |
| Synthesis of results          | 21 | Present results of each meta-analysis done, including confidence intervals and measures of consistency.                                                                                                  | figure 4                                |
| Risk of bias across studies   | 22 | Present results of any assessment of risk of bias across studies (see Item 15).                                                                                                                          | figure 4<br>Page 10 Paragraph 1         |

|                     |    |                                                                                                                                                                                      |                                    |
|---------------------|----|--------------------------------------------------------------------------------------------------------------------------------------------------------------------------------------|------------------------------------|
|                     |    |                                                                                                                                                                                      | Online supplementary figure 4      |
| Additional analysis | 23 | Give results of additional analyses, if done (e.g., sensitivity or subgroup analyses, meta-regression [see Item 16]).                                                                | None.                              |
| <b>DISCUSSION</b>   |    |                                                                                                                                                                                      |                                    |
| Summary of evidence | 24 | Summarize the main findings including the strength of evidence for each main outcome; consider their relevance to key groups (e.g., healthcare providers, users, and policy makers). | Page 10 Paragraph 2                |
| Limitations         | 25 | Discuss limitations at study and outcome level (e.g., risk of bias), and at review-level (e.g., incomplete retrieval of identified research, reporting bias).                        | Page 14 Paragraph 1                |
| Conclusions         | 26 | Provide a general interpretation of the results in the context of other evidence, and implications for future research.                                                              | Page 14 Paragraph 2                |
| <b>FUNDING</b>      |    |                                                                                                                                                                                      |                                    |
| Funding             | 27 | Describe sources of funding for the systematic review and other support (e.g., supply of data); role of funders for the systematic review.                                           | Complete draft Page 14 Paragraph 5 |

**e-references**

1. Alcázar Lázaro V, del Ser Quijano T, Barba Martín R. Hypoalbuminemia and other prognostic factors of mortality at different time points after ischemic stroke. *Nutr Hosp* 2013;28:456-63
2. Carter AM, Catto AJ, Mansfield MW, *et al.* Predictive variables for mortality after acute ischemic stroke. *Stroke* 2007;38:1873-80
3. Greenland S, Longnecker MP. Methods for trend estimation from summarized dose-response data, with applications to meta-analysis. *Am J Epidemiol* 1992;135:1301-9
4. Idicula TT, Waje-Andreassen U, Brogger J, *et al.* Serum albumin in ischemic stroke patients: The higher the better. The bergen stroke study. *Cerebrovasc Dis* 2009;28:13-7
5. Gariballa SE, Parker SG, Taub N, *et al.* Influence of nutritional status on clinical outcome after acute stroke. *Am J Clin Nutr* 1998;68:275-81
6. Dzedzic T, Slowik A, Szczudlik A. Serum albumin level as a predictor of ischemic stroke outcome. *Stroke* 2004;35:e156-8
7. Higgins JP, Thompson SG, Deeks JJ, *et al.* Measuring inconsistency in meta-analyses. *Bmj* 2003;327:557-60
8. Babu MS, Kaul S, Dadheech S, *et al.* Serum albumin levels in ischemic stroke and its subtypes: Correlation with clinical outcome. *Nutrition* 2013;29:872-5
